# Supplementary material
Source: PubMed Central journal article supplement (PMC3935290)
Supplement: NIHMS403573-supplement-01.pdf [file NIHMS403573-supplement-01.pdf]

# SUPPLEMENTARY INFORMATION

doi:10.1038/nature09803

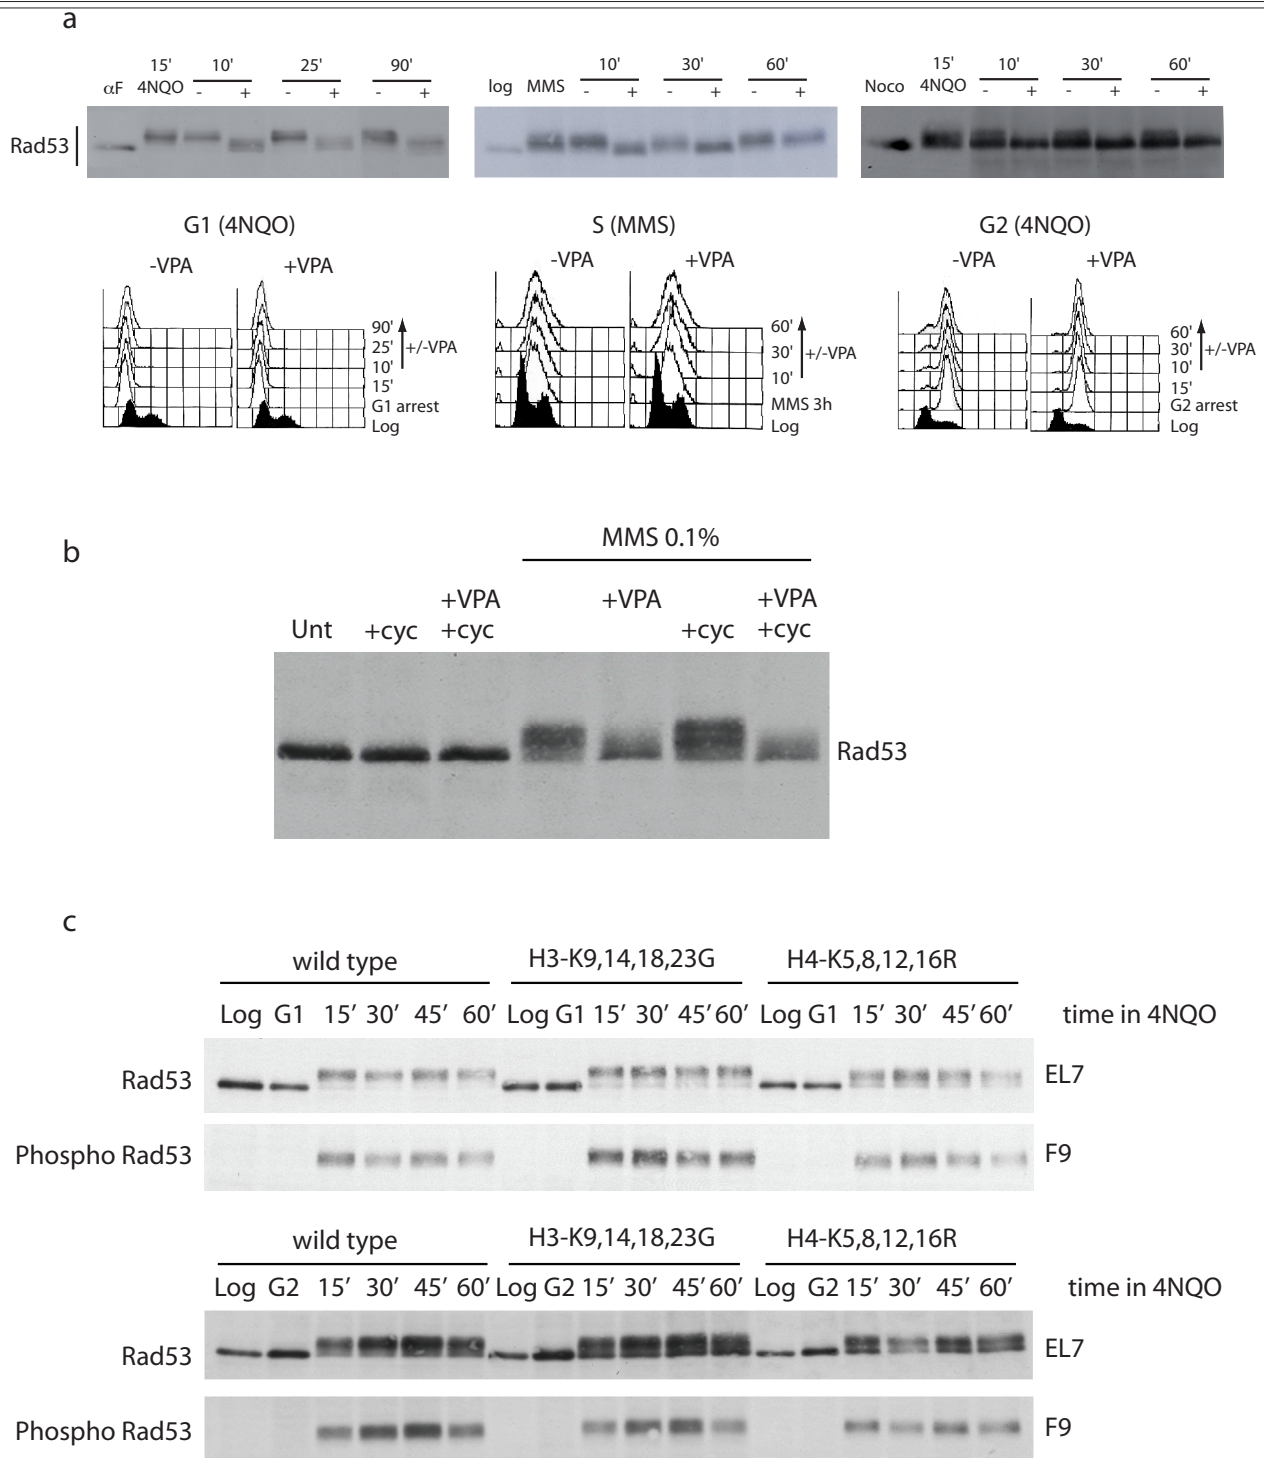

**Supp. Fig. 1 (a)** W303 cells were arrested in G1 with  $\alpha$ -factor or G2 with Nocodazole and treated with 2  $\mu$ g/ml 4NQO. After 15', VPA was added (+) or not added (-). Log cells were treated with 0.02% MMS. After 3h, VPA was added (+) or not added (-). At the indicated times cell samples were processed for Western blot and FACS analysis. **(b)** Log-phase WT W303 cells were treated with 0.1% MMS for 1h to activate Rad53. 10 mM VPA was added for 10 min before collecting the sample (+VPA). 5  $\mu$ g/ml of cycloheximide was added 10 min before VPA treatment (+cyc). Subsequently, samples were analysed by Western blot. **(c)** WT (RMY200), H3-K9, 14, 18, 23G (RMY250), H4-K5, 8, 12, 16R (FLY722) cells were arrested with  $\alpha$ -factor or with Nocodazole and treated with 4NQO (0.8  $\mu$ g/ml). At the indicated time points, samples were collected for Western blot analysis using antibodies that recognize the Rad53 protein backbone (EL7) and the phosphorylated Rad53 (F9).

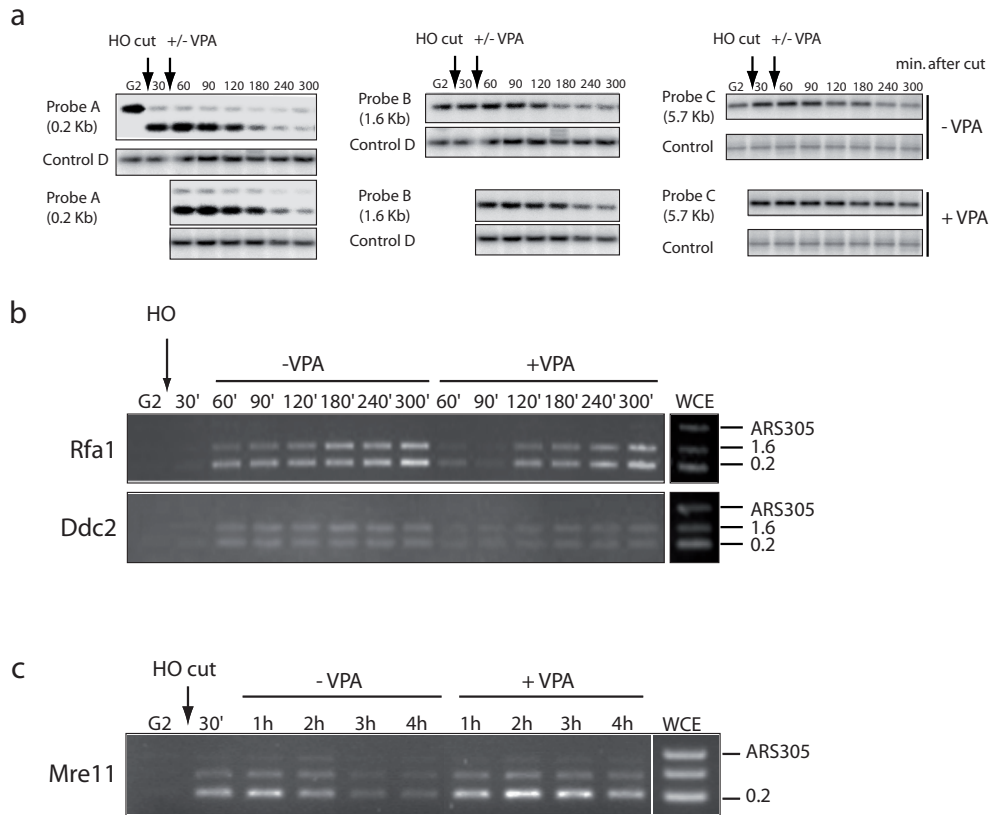

**Supp. Fig. 2** VPA treatment counteracts the DSB processing. **(a-b-c)** *DDC2::MYC RFA1::FLAG* (CY8122) and *MRE11::MYC* (CY6213) cells grown in YP-raffinose were arrested in G2 with Nocodazole and subsequently released in YP-galactose to induce HO endonuclease expression. After 30' from HO induction, 10 mM VPA was added (+VPA) or not added (-VPA) to half of the culture. At the indicated time points cell samples were taken and processed for: southern blot analysis using probe A (0.2 Kb), B (1.6 Kb) and C (5.7 Kb) **(a)** and ChIP analysis of Rfa1-Flag, Ddc2-Myc or Mre11-Myc **(b-c)**.

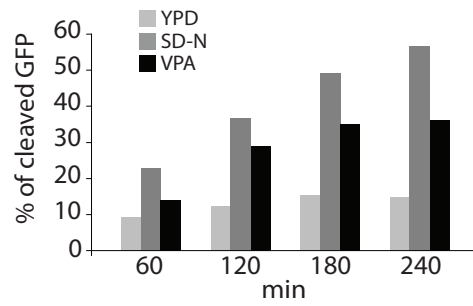

**Supp. Fig. 3** Quantification of GFP-Atg8 cleavage. % of cleaved band is calculated as the ratio of the GFP cleaved product over GFP + GFP-Atg8 total amount of protein.

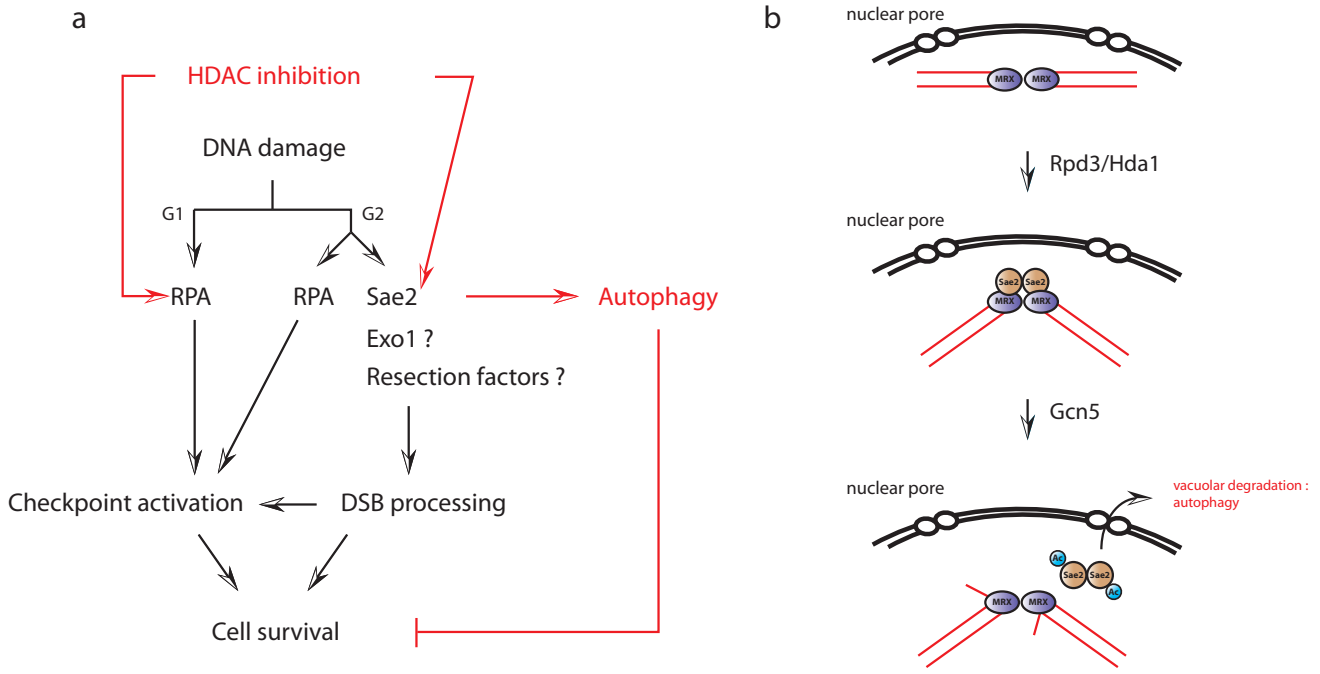

**Supp. Fig4:** HDACs influence DNA damage response and cell survival (a) Following DNA damages, HDAC activity regulates checkpoint activation throughout the cell cycle. In G1 and G2, Rfa1-acetylation might influence RPA nucleofilament formation and checkpoint control. Moreover, in G2, acetylation influences the stability of resection factors by inducing vacuolar degradation (autophagy). Acetylation and autophagy influence cell survival after exposure to DNA damaging agents (b) A model linking HDAC activities, DSB processing and autophagy. Sae2 acetylation level might facilitate the degradation of Sae2 oligomers through an autophagic pathway (see text for details).

**Supplementary Table 1:**

|         |                                                                                                            |             |
|---------|------------------------------------------------------------------------------------------------------------|-------------|
| W303-1A | <i>MATa, ade2-1, ura3-1, trp1-1, leu2-3,112, his3-11,15, can1-100, GAL, rad5-535</i>                       | R.Rothstein |
| W303-1B | <i>MATalpha, ade2-1, ura3-1, trp1-1, leu2-3,112, his3-11,15, can1-100, GAL, rad5-535</i>                   | R.Rothstein |
| SY653   | <i>MATa, hoΔ, hml1Δ::ADE1, hmrΔ::ADE1, adel-100, leu2-3,112, lys5, trp1Δ::hisG, ura3-52, ade3::GAL::HO</i> | J.E. Haber  |
| CY8093  | SY653 <i>rpd3Δ::NAT</i>                                                                                    | This study  |
| CY8126  | SY653 <i>hda1Δ::NAT</i>                                                                                    | This study  |
| CY8255  | SY653 <i>hda1Δ::NAT rpd3Δ::NAT</i>                                                                         | This study  |
| CY8122  | SY653 <i>ddc2::DDC2::MYC9::TRP1, rfa1::RFA1::3FLAG::KanMX</i>                                              | This study  |
| CY6213  | SY653 <i>mre11::MRE11::MYC13::KanMX</i>                                                                    | Lab. Stock  |
| CY9236  | SY653 <i>sae2::SAE2::6PK::TRP1</i>                                                                         | This study  |
| CY9324  | SY653 <i>rpd3Δ::NAT, hda1Δ::NAT, sae2::SAE2::6PK::TRP1</i>                                                 | This study  |
| CY9545  | SY653 <i>mre11::MRE11::MYC13::KanMX, sae2::SAE2::6PK::TRP1, exo1::EXO1::FLAG::KanMX</i>                    | This study  |
| CY9541  | SY653 <i>SAE2::6PK::TRP1, erg6Δ::KanMX4</i>                                                                | This Study  |
| CY10298 | SY653 <i>sae2::SAE2::6PK::TRP1, gcn5Δ::KanMX</i>                                                           | This Study  |
| CY10325 | SY653 <i>MATalpha SAE2::6PK::TRP1, atg19Δ::KanMX4</i>                                                      | This Study  |

|        |                                                                                                                                                       |            |
|--------|-------------------------------------------------------------------------------------------------------------------------------------------------------|------------|
| SY2451 | <i>MATa ade2-1, leu2-3,112, his3-15, trp1-1, CAN1, arg4ΔBgIII, URA3::arg4Δ<br/>EcoRV::ura3-1</i>                                                      | S Gangloff |
| CY9549 | <i>MATalpha, ade2-1, trp1-1, his3-11,15, leu2-3,112, CAN1, arg4ΔBgIII, URA3::arg4Δ<br/>EcoRV::ura3-1, hda1Δ::NAT, rpd3Δ::TRP1</i>                     | This study |
| CY9663 | <i>MATalpha, hoΔ, hml1Δ::ADE1, hmrΔ::ADE1, ade1-100, leu2-3,112, lys5, trp1Δ::hisG,<br/>ura3-52, ade3::GAL::HO atg1Δ::KanMX</i>                       | This study |
| CY9666 | <i>MATalpha, hoΔ, hml1Δ::ADE1, hmrΔ::ADE1, ade1-100, leu2-3,112, lys5, trp1Δ::hisG,<br/>ura3-52, ade3::GAL::HO atg1Δ::KanMX sae2::SAE2::6PK::TRP1</i> | This study |
| CY6944 | <i>Mata, hmlΔ::ADE1, hmrΔ::ADE1 ade1-100, trp1Δ::hisG, leu2-3,112, lys5, ura3-52,<br/>ade3::GAL::HO, KanMX6::GAL1::SAE2::4HA::sae2</i>                | Lab. Stock |
| CY3213 | <i>W303-1A, rfa1::RFAL::9MYC::TRP1</i>                                                                                                                | Lab. Stock |
| SY2080 | <i>MATa, ade2-1, ura3-1, trp1-1, leu2-3,112, his3-11,15, can1-100, GAL, RAD5</i>                                                                      | H.Klein    |
| CY8270 | <i>SY2080 rpd3Δ::TRP1</i>                                                                                                                             | This study |
| CY8219 | <i>SY2080 hda1Δ::NAT</i>                                                                                                                              | This study |
| CY8335 | <i>SY2080 hda1Δ::NAT, rpd3Δ::TRP1</i>                                                                                                                 | This study |
| YZX288 | <i>MATalpha his3-D200 leu2-3,112 lys2-801 ura3-52 trp1-D901 suc2-D9 Cherry-<br/>APE1::TRP1 GFP-ATG8::URA3</i>                                         | D.Klionsky |
| YZX298 | <i>MATalpha his3-D200 leu2-3,112 lys2-801 ura3-52 trp1-D901 suc2-D9 Cherry-<br/>APE1::TRP1 GFP-ATG8::URA3 atg1Δ::LEU2</i>                             | D.Klionsky |
| TN124  | <i>MATa leu2-3,112 ura3-52 pho8::pho8Δ60</i>                                                                                                          | D.Klionsky |
| HAY572 | <i>MATa leu2-3,112 ura3-52 pho8::pho8Δ60 atg1Δ::URA3</i>                                                                                              | D.Klionsky |

|         |                                                                                                                                 |              |
|---------|---------------------------------------------------------------------------------------------------------------------------------|--------------|
| ySP2656 | W303 <i>MATa</i> <i>MAD3-HA3::URA3, PDS1-MYC18::LEU2</i>                                                                        | S. Piatti    |
| RMY200  | <i>MATa ade2-101, his3,200, lys2-801, trp1-901, ura3-52 hht1, hhf1::LEU2 hht2 hhf2::HIS3 [CEN4 ARS1 TRP1 HHT2 HHF2]</i>         | M. Grunstein |
| RMY250  | <i>MATa ade2-101 his3 200 lys2-801 trp1-901 ura3-52 hht1 hhf1::LEU2 hht2 hhf2::HIS3 [CEN4 ARS1 TRP1 hht2-K9,14,18,23G HHF2]</i> | M. Grunstein |
| FLY722  | <i>MATa ade2-101 leu2-3,112 lys2-801 trp1- 901 ura3-52 hhf1::HIS3 hhf2::TRP1-hhf2-K5,8,12,16R HHT2</i>                          | J.K. Tyler   |
